# Supplementary material for: IDO and galectin-3 hamper the ex vivo generation of clinical grade tumor-specific T cells for adoptive cell therapy in metastatic melanoma
Source: Springer Nature journal article supplement (doi:10.1007/s00262-017-1995-x), 2017-04-11
Supplement: MOESM1 [file 12216848]

Supplementary Figure S1

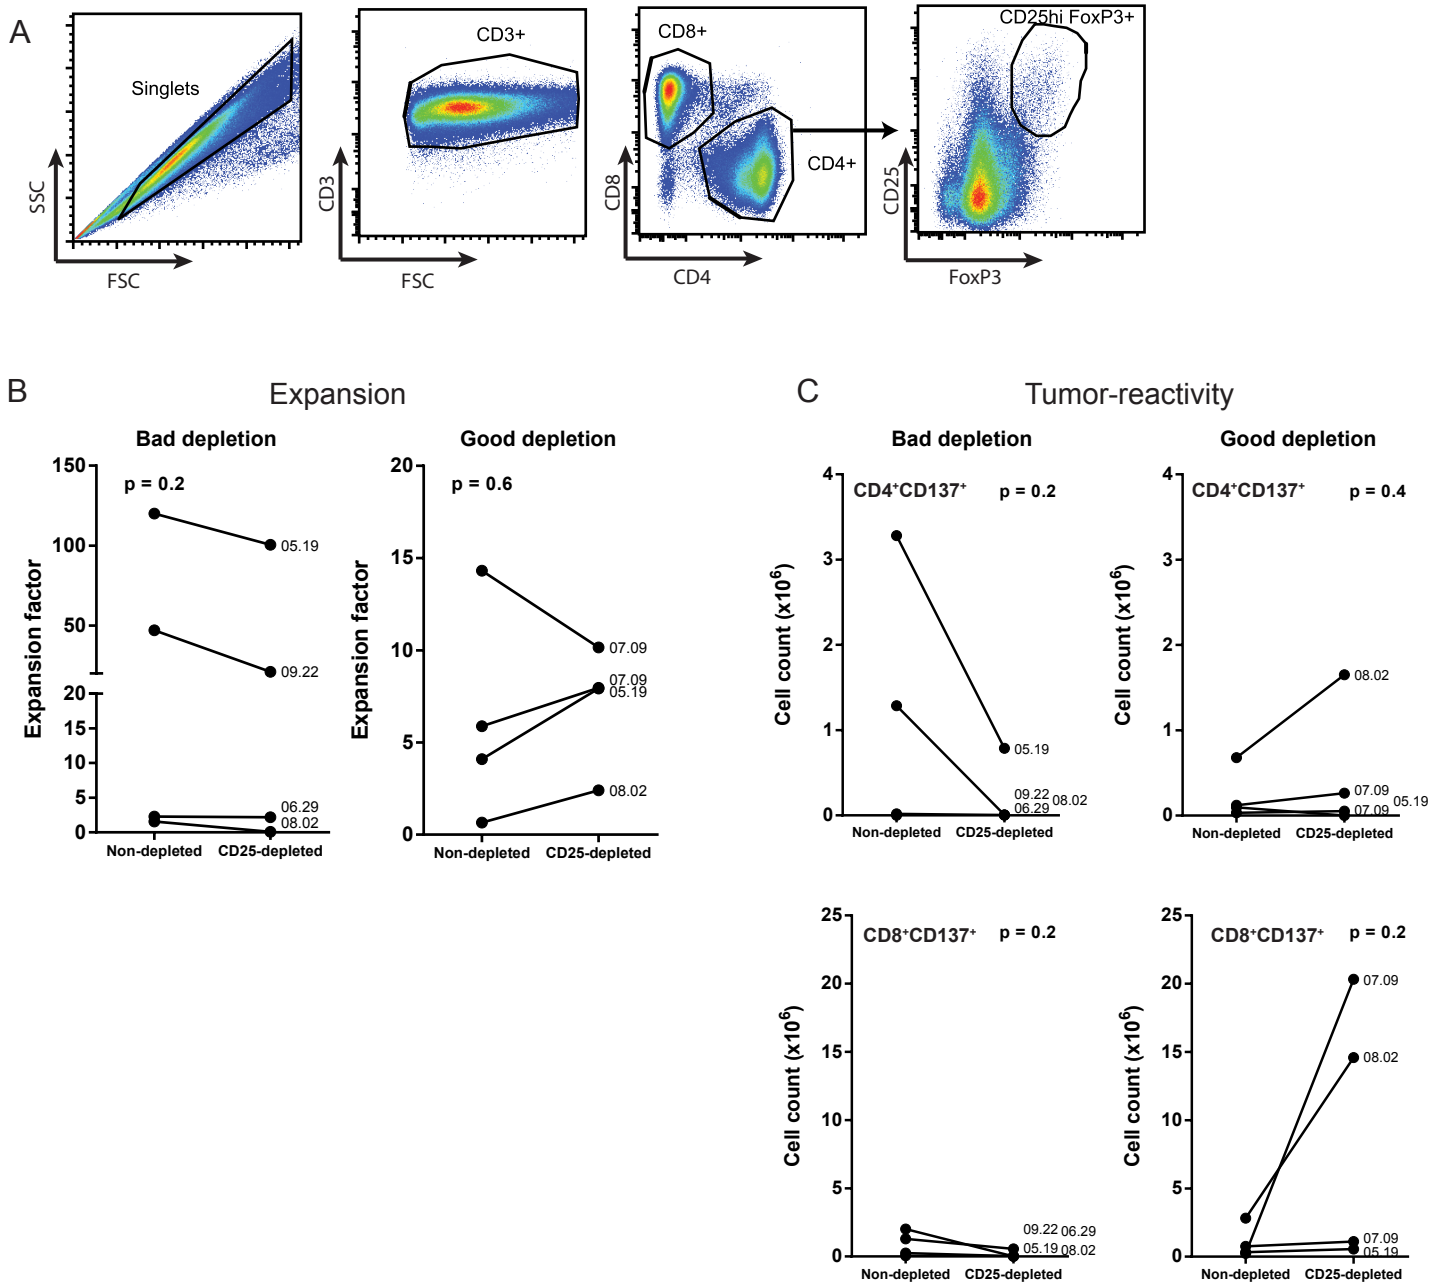

**Supplementary Figure S1. The effects of CD25<sup>+</sup> T cell depletion during MLTC.**

**(A)** Gating strategy of flow cytometric analysis of CD4<sup>+</sup>CD25<sup>hi</sup>FoxP3<sup>+</sup> T cells in PBMC

and T cell batches. **(B,C)** Expansion factors **(B)** and numbers of tumor-reactive T cells

**(C)** of non-depleted and CD25-depleted T cell batches divided for experiments with bad and good depletion of Tregs after MACS separation with CD25-specific beads.

## Supplementary Figure S2

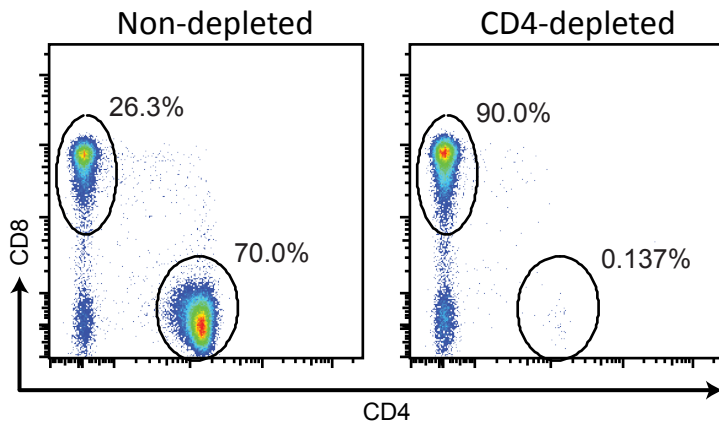

### Supplementary Figure S2. Efficacy of CD4 depletion in PBMC.

Flow cytometric analysis of PBMC that were depleted for CD4 T cells using MACS technology.

Supplementary Figure S3

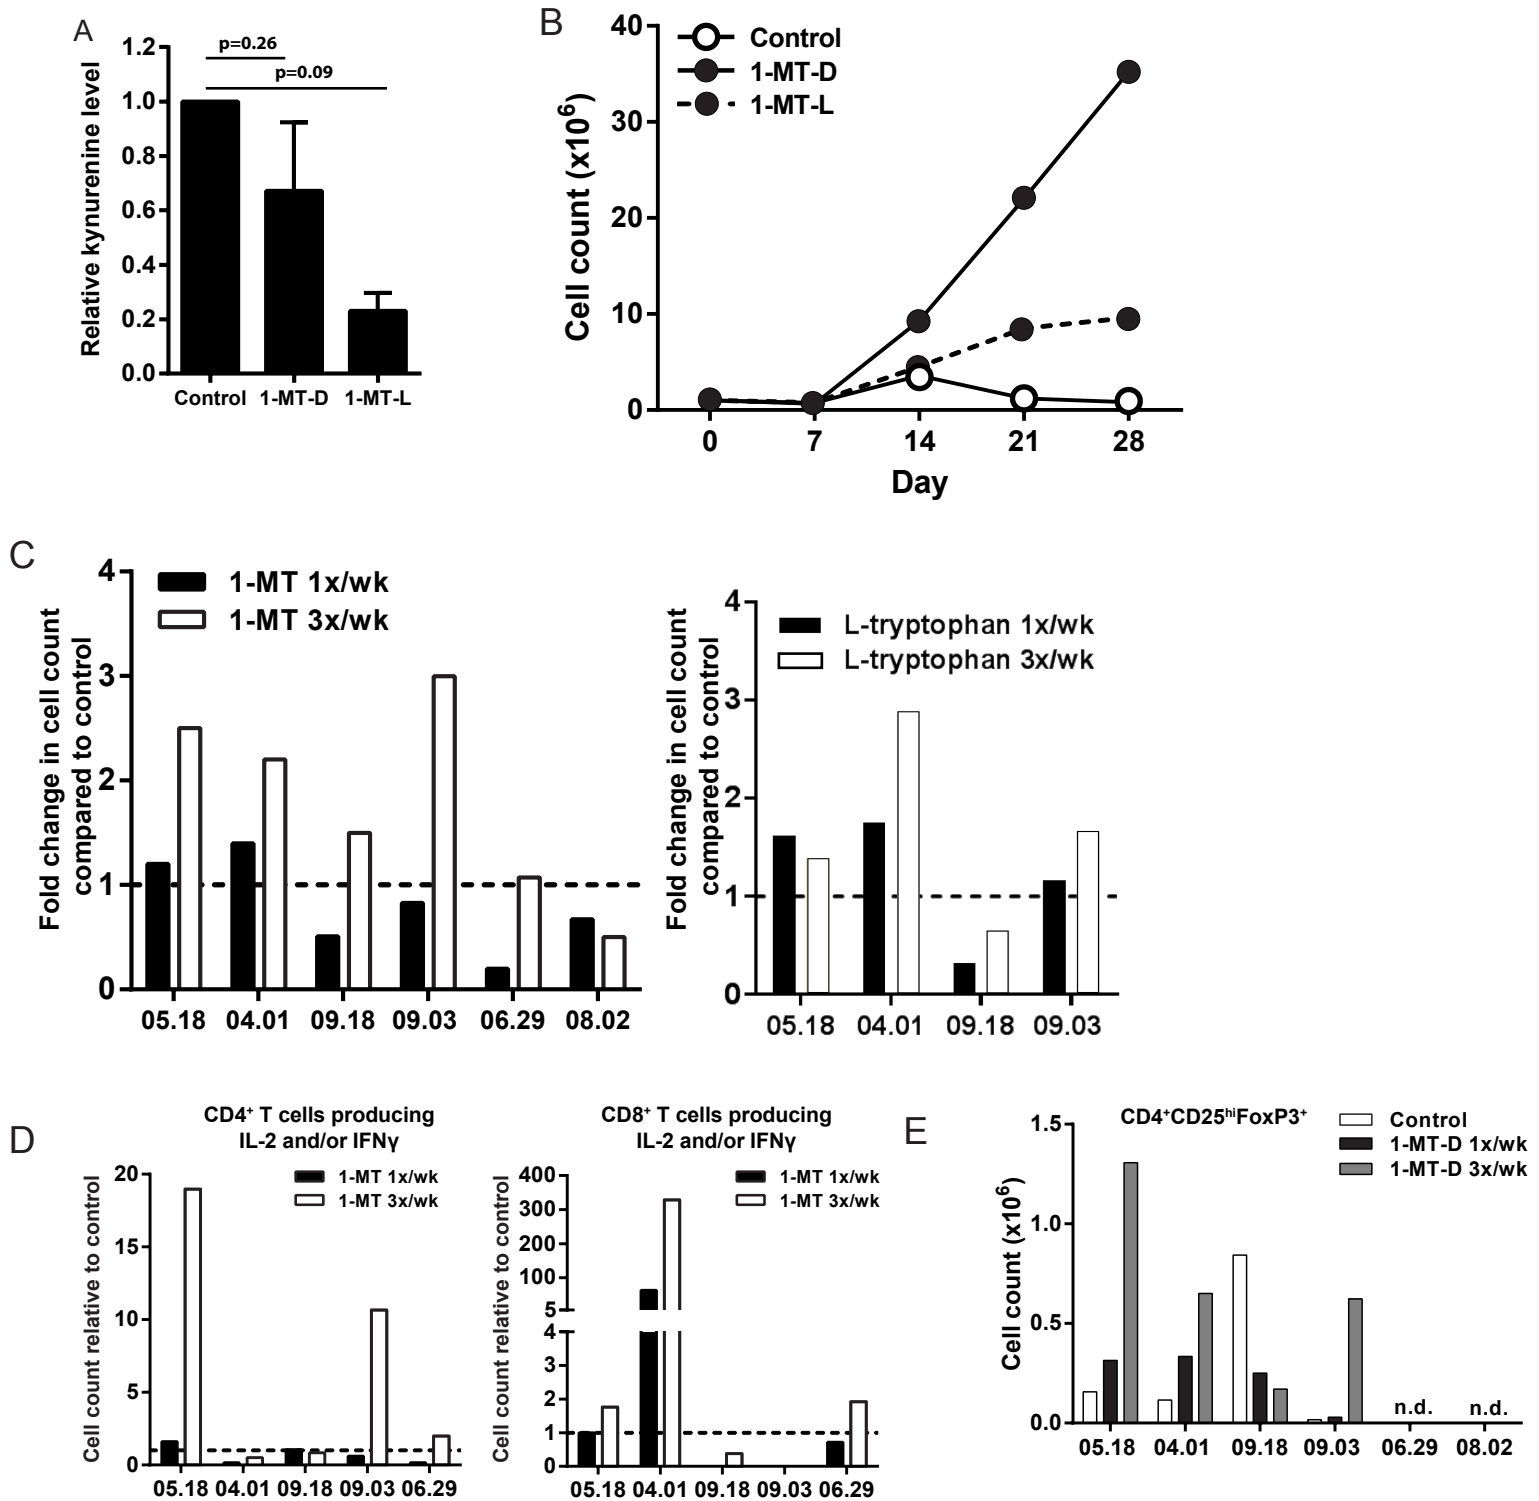

**Supplementary Figure S3. The effects of IDO inhibition during MLTC.**

(A) The relative kynurenine concentrations in the culture supernatant of the MLTC after addition of the IDO inhibitors 1-MT-D and 1-MT-L. (B) Expansion of T cells in MLTC to which either 1-MT-D or 1-MT-L was added once a week. (C) Fold change in cell counts compared to control at week 4 of MLTC of 6 independent experiments comparing the addition of 1-MT-D once a week versus three times per week (left panel) and addition of L-tryptophan once a week versus three times a week (right panel) (fold change compared to control culture without addition of 1-MT-D). (D) Fold change in cell counts of cytokine (IL-2 and/or IFN $\gamma$ ) producing tumor-reactive (CD137<sup>+</sup>) cells compared to control at week 4 of MLTC of 5 independent experiments comparing the addition of 1-MT-D once a week versus three times per week (fold change compared to control culture without addition of 1-MT-D). (E) Frequencies of Tregs in T cell batches that were generated using MLTC with and without the addition of 1-MT-D.

## Supplementary Figure S4

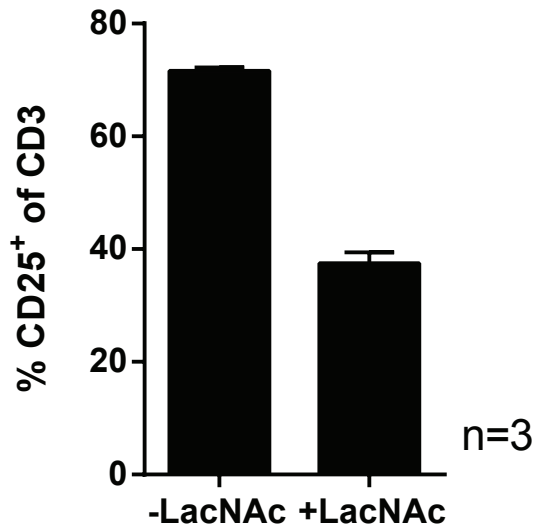

### Supplementary Figure S4. The effect of LacNAc on PHA activated CD25<sup>+</sup> T cells.

Frequencies of CD25<sup>+</sup> cells in the short inhibition assay in the control condition (no tumor cells, only PHA stimulation) with and without addition of LacNAc.
